# Supplementary material
Source: publisher figshare collection journal article supplement (https://future-science-group.figshare.com/ndownloader/files/31383085)

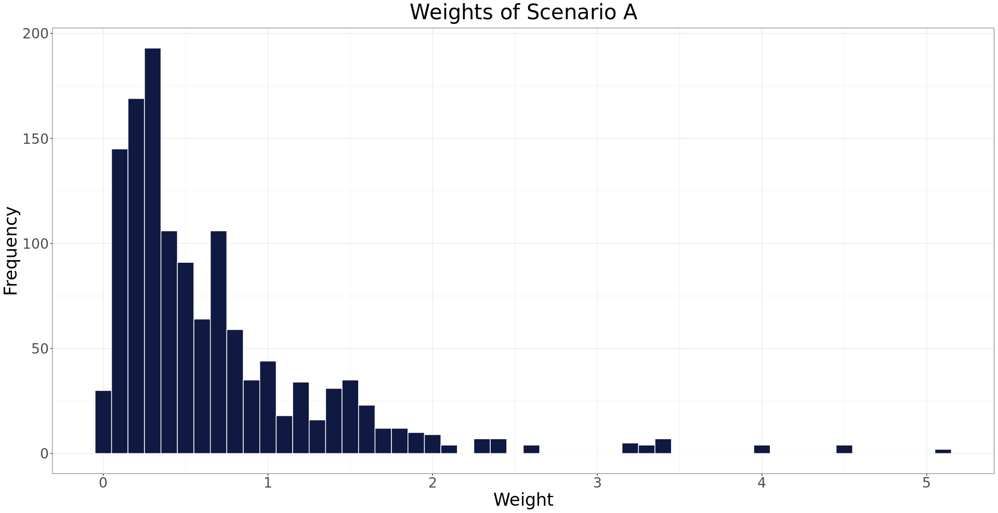

Supplement: Supplementary file 1 [file 31383085]
